# Supplementary material
Source: PubMed Central journal article supplement (PMC8122078)

Fig.1k

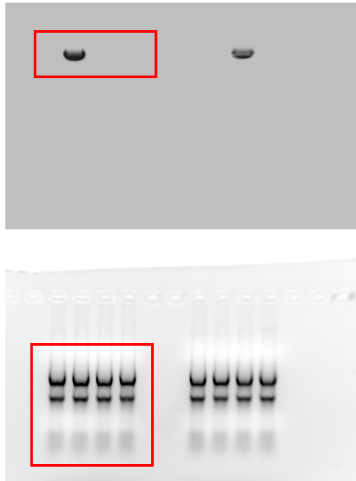

NB: LIMIT

Fig.1l

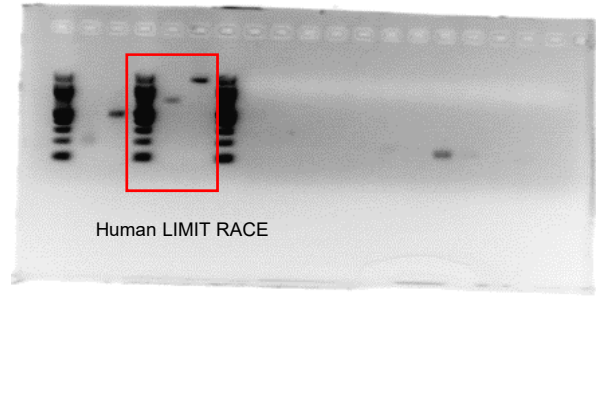

Fig.1m

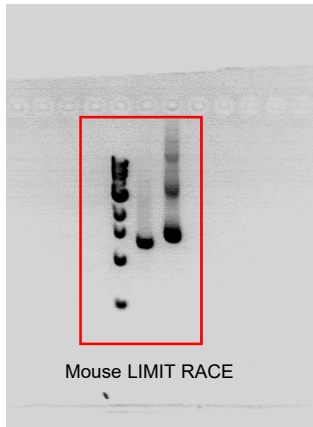

Fig.1n

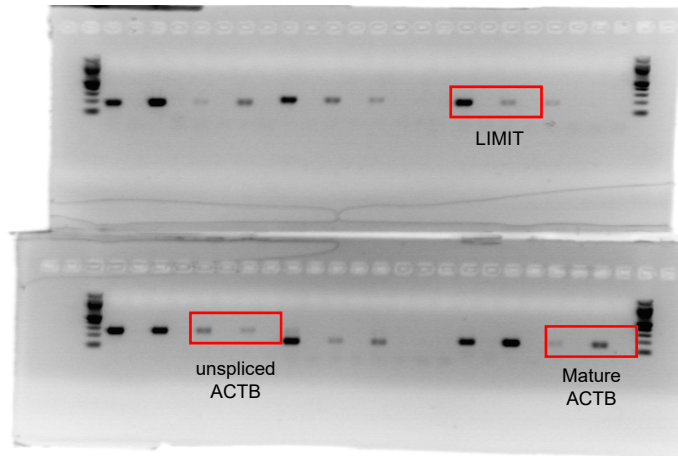

Supplement: NIHMS1689276-supplement-Unmodified_blots_Fig1.pdf [file NIHMS1689276-supplement-Unmodified_blots_Fig1.pdf]

**Fig.4b**

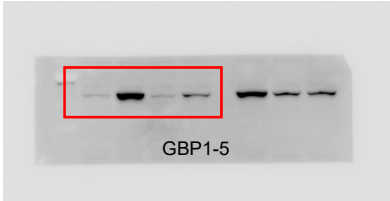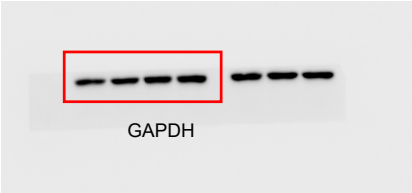

**Fig.4d**

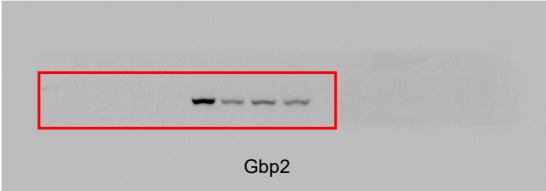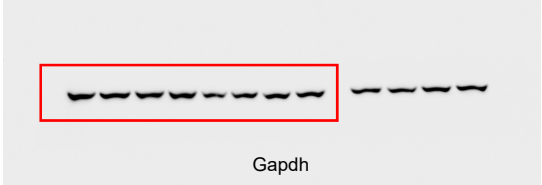

**Fig.4j**

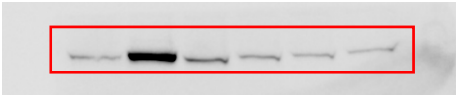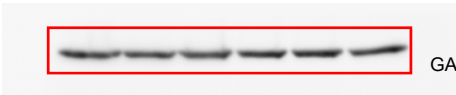

**Fig.4k**

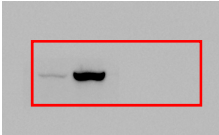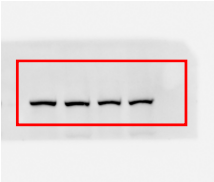

Supplement: NIHMS1689276-supplement-Unmodified_blots_Fig4.pdf [file NIHMS1689276-supplement-Unmodified_blots_Fig4.pdf]

**Fig.5c**

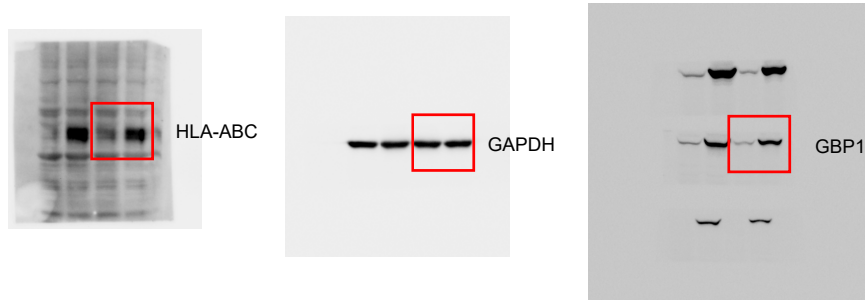

**Fig.5f**

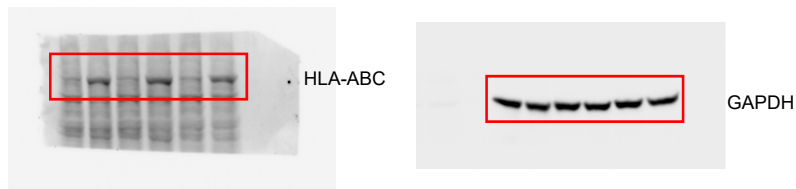

**Fig.5h**

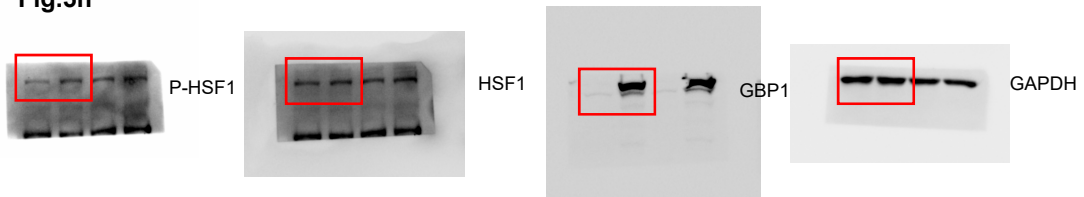

**Fig.5i**

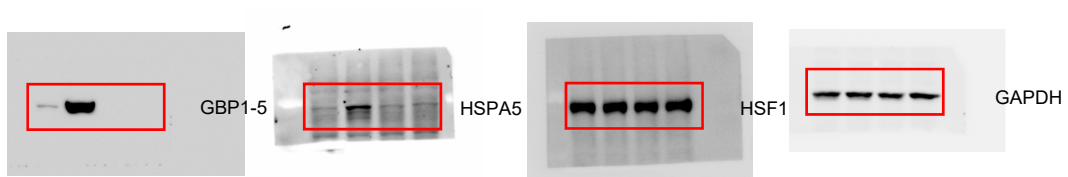

**Fig.5k**

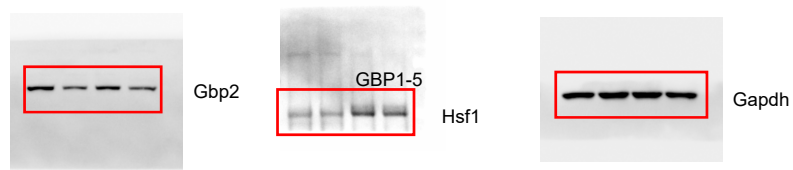

Supplement: NIHMS1689276-supplement-Unmodified_blots_Fig5.pdf [file NIHMS1689276-supplement-Unmodified_blots_Fig5.pdf]

**Fig.6a**

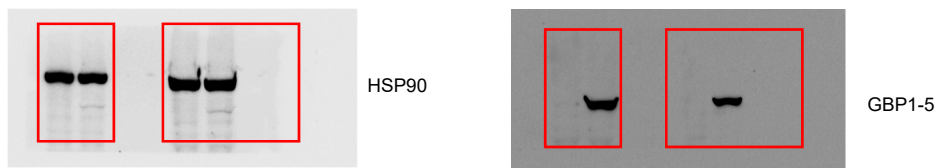

**Fig.6b**

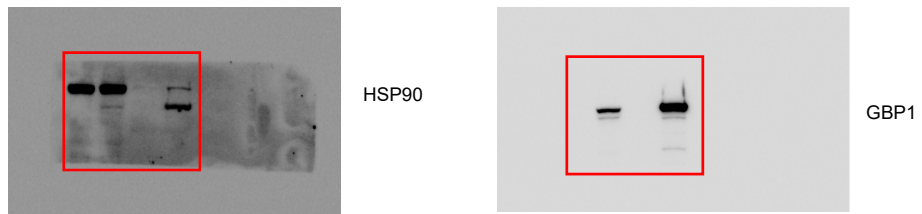

**Fig.6d**

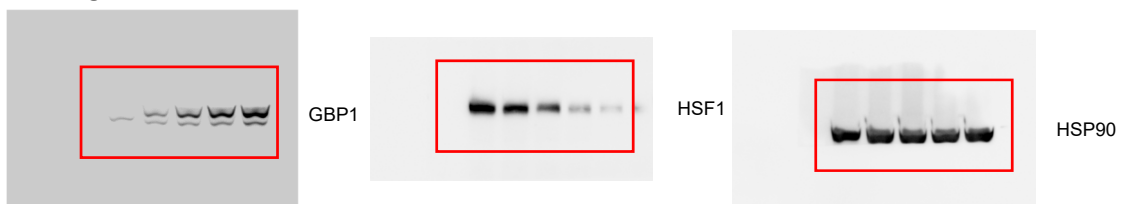

**Fig.6e**

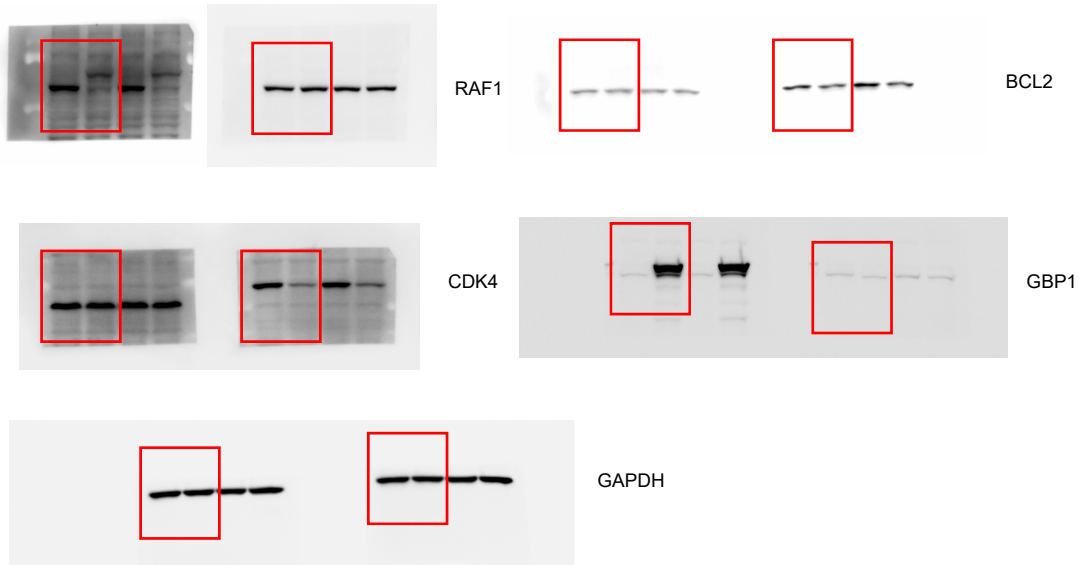

**Fig.6h**

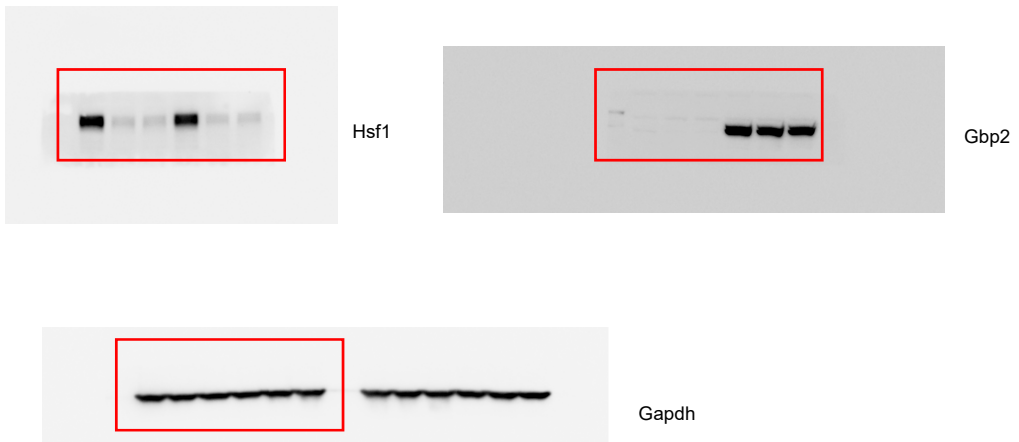

Supplement: NIHMS1689276-supplement-Unmodified_blots_Fig6.pdf [file NIHMS1689276-supplement-Unmodified_blots_Fig6.pdf]
